1 **Persistent malaria transmission from asymptomatic children despite highly effective malaria control**  
2 **in eastern Uganda**

3 Chiara Andolina\*, John Rek\*, Jessica Briggs\*, Joseph Okoth, Alex Musiime, Jordache Ramjith, Noam  
4 Teyssier, Melissa Conrad, Joaniter I. Nankabirwa, Kjerstin Lanke, Isabel Rodriguez-Barraquer, Lisette  
5 Meerstein-Kessel, Emmanuel Arinaitwe, Peter Olwoch, Philip J. Rosenthal, Moses R. Kanya, Grant  
6 Dorsey, Bryan Greenhouse, Chris Drakeley, Sarah G. Staedke#, Teun Bousema#

7  
8 <sup>1</sup>Department of Medical Microbiology, Radboud University Nijmegen Medical Centre, Nijmegen, the  
9 Netherlands, <sup>2</sup>Infectious Diseases Research Collaboration, Kampala, Uganda, <sup>3</sup>Department of Medicine,  
10 San Francisco General Hospital, University of California, San Francisco, USA, <sup>4</sup>Department for Health  
11 Evidence, Radboud University Medical Center, Nijmegen, the Netherlands, <sup>5</sup>Department of Medicine,  
12 Makerere University College of Health Sciences, Kampala, Uganda, <sup>6</sup>Department of Infection Biology,  
13 London School of Hygiene and Tropical Medicine, London, UK, <sup>7</sup>Department of Clinical Research, London  
14 School of Hygiene and Tropical Medicine, London, UK

15

16 **Summary**

17 **Background.** Persistent asymptomatic *Plasmodium falciparum* infections are common in malaria-  
18 endemic settings, but their contribution to transmission is poorly understood.

19 **Methods.** A cohort of children and adults from Tororo, Uganda was closely followed for 24 months by  
20 continuous passive surveillance and routine assessments. *P. falciparum* parasite density, gametocyte  
21 density and genetic composition were determined molecularly; mosquito membrane feeding assays  
22 were performed on samples from participants with symptomatic and asymptomatic infections.

23 **Findings.** From October 2017 to October 2019, we followed all 531 residents from 80 households.  
24 Parasite prevalence was 5.8% by microscopy and 17.3% by PCR at enrolment and declined thereafter.  
25 We conducted 538 mosquito feeding experiments on samples from 107 individuals. Mosquito infection  
26 rates were strongly associated with gametocyte densities of participants. Considering both  
27 transmissibility of infections and their relative frequency, the estimated human infectious reservoir was  
28 primarily asymptomatic microscopy-detected infections (83.8%), followed by asymptomatic  
29 submicroscopic (15.6%) and symptomatic (0.6%) infections. Over half of the infectious reservoir was  
30 children aged 5-15 years (56.8%); individuals <5 years (27.5%) and  $\geq 16$  years (15.7%) contributed less.  
31 Four children were responsible for 62.6% (279/446) of infected mosquitos and were infectious at  
32 multiple timepoints.

33 **Interpretation** Individuals with asymptomatic infections were important drivers of malaria transmission.

34 **Conclusion** Children were responsible for over half of all mosquito infections, with a small minority of

35 asymptomatic children highly infectious. Demographically targeted interventions, aimed at school-aged  
36 children, could further reduce transmission in areas under effective vector control.

37

38 **Funding** National institute of Health, Bill & Melinda Gates Foundation, European Research Council.

39 **Keywords:** malaria; transmission; falciparum; longitudinal study; gametocyte.

40

## 41 INTRODUCTION

42 Despite global efforts to control and eliminate malaria, progress has plateaued in recent years, and in  
43 some high transmission settings malaria burden is increasing.<sup>1</sup> Optimizing vector control and treatment  
44 of symptomatic cases are central to malaria control and elimination efforts. However, symptomatic  
45 malaria cases reflect only a small proportion of all *Plasmodium* infections, and many infected individuals  
46 are asymptomatic. Asymptomatic infections are common in all malaria-endemic settings;<sup>2</sup> although their  
47 prevalence is dependent on exposure to parasites, antimalarial immunity, use of preventive measures,  
48 and care-seeking behaviour.<sup>3</sup> Asymptomatic infections with *Plasmodium falciparum* are particularly  
49 prevalent in school-aged children, who experience a higher force of infection and more persistent  
50 parasitaemia than younger children or adults.<sup>4,5</sup> In persistent infections, parasite densities may fluctuate  
51 over time, and are often below the threshold of detection by microscopy or conventional malaria rapid  
52 diagnostic tests.<sup>2,6</sup> These submicroscopic infections are disproportionately prevalent in areas of low  
53 endemicity and in settings that have experienced a recent decline in malaria burden.<sup>2</sup>

54 There is considerable debate about the characteristics of the human infectious reservoir and  
55 understanding the relative contributions of symptomatic and asymptomatic infections to onward  
56 transmission of malaria parasites to mosquitos is essential for guiding interventions to reduce and  
57 eliminate transmission.<sup>7-9</sup> These contributions depend on infection density, infection duration, care-  
58 seeking behaviour, and importantly, gametocyte production. The likelihood that mosquitos become  
59 infected is positively associated with gametocyte density.<sup>10</sup> However, due to variability in both the  
60 timing and level of *P. falciparum* gametocyte production, and the long gametocyte maturation process,  
61 gametocytes are absent during the early stages of a human infection. Thus, an association between  
62 asexual parasite and gametocyte density may be lacking in symptomatic infections and is weak in  
63 asymptomatic infections.<sup>11-14</sup>

64 To better understand the contributions of different populations to the human infectious  
65 reservoir for malaria, we performed a longitudinal study in Tororo, Uganda, previously a high  
66 transmission area that is currently under effective malaria control due to broad implementation of long-  
67 lasting insecticidal nets (LLINs) and indoor residual spraying of insecticides (IRS). We assessed the  
68 density, genetic composition, and kinetics of naturally acquired *P. falciparum* infections in an all-age  
69 cohort of Tororo residents. Gametocyte carriage and infectivity to mosquitos were quantified and  
70 compared between age groups and between participants with symptomatic and asymptomatic  
71 infections.

72

73

74

## 75 **METHODS**

### 76 **Study design and participants**

77 The study was conducted in Nagongera sub-county (Tororo district) in eastern Uganda. Before 2013,  
78 malaria control in the district focused on malaria case management with artemether-lumefantrine,  
79 distribution of LLINs during antenatal visits, and promotion of intermittent preventive treatment during  
80 pregnancy. Universal LLIN distribution campaigns were conducted in November 2013 and May 2017.  
81 Sustained IRS has been maintained since December 2014, starting with rounds of bendiocarb every 6  
82 months, and followed by annual rounds of pirimiphos-methyl (Actellic) since June 2016.<sup>15</sup> Prior to IRS  
83 implementation, the annual *P. falciparum* entomological inoculation rate was 238 infectious bites per  
84 person per year (ib/p/yr) which was markedly reduced to 0.43 ib/p/yr five years later.<sup>15</sup> In this context,  
85 we conducted a longitudinal study that is described in detail elsewhere.<sup>15</sup> Ethical approval for the study  
86 was received from the Uganda National Council of Science and Technology (HS119ES), Makerere  
87 University School of Medicine, the University of California, San Francisco and the London School of  
88 Hygiene & Tropical Medicine.

89

### 90 **Procedures**

91 At baseline and at routine visits conducted every 4 weeks for 2 years, a standardized clinical evaluation  
92 was performed, and blood samples were collected. Cohort participants were encouraged to attend a  
93 dedicated study clinic open daily for all medical care. Study participants found to have a tympanic  
94 temperature > 38.0°C or history of fever in the previous 24 hours had a thick blood smear read urgently.  
95 If the thick blood smear was positive for malaria parasites by microscopy, samples were taken and  
96 malaria was treated according to national guidelines. Blood samples drawn at the onset of each malaria  
97 episode and at routine visits were assessed by quantitative PCR (qPCR) for *P. falciparum* parasite density,  
98 targeting the multi-copy conserved var gene acidic terminal sequence (varATS), with a lower limit of  
99 detection of 0.05 parasite/μL using 200 μL whole blood samples.<sup>16</sup> For all qPCR positive samples, 100 μL  
100 of blood in RNA preservative (RNAprotect Qiagen) was used for automatic extraction of nucleic acids to  
101 quantify male (PfMGET mRNA transcripts) and female (CCp4 mRNA) gametocytes by quantitative  
102 reverse transcriptase PCR (qRT-PCR) with a lower limit of detection of 0.1 gametocytes/μL.<sup>17</sup> For the  
103 few (n=3) samples that were microscopy positive for gametocytes but qRT-PCR negative, microscopy  
104 gametocyte densities were used for analyses. Mosquito membrane feeding assays were performed on  
105 selected individuals who were diagnosed with symptomatic malaria, or at the time of routine visits if an  
106 individual was qPCR positive at their preceding visit, as described previously.<sup>18</sup> Ten days post-feeding,  
107 mosquitos were dissected in 1% mercurochrome and examined for the presence of oocysts on the  
108 mosquito midgut wall by two microscopists; *P. falciparum* DNA (18S) was detected in infected guts by  
109 nested PCR. To assess parasite diversity, DNA from study participants and infected mosquito midguts

110 was analyzed by amplicon deep sequencing of the apical membrane antigen 1 (AMA-1) gene, as  
111 described previously,<sup>19</sup> over the entire period of follow-up. New infections were defined as the  
112 appearance of a new clone or group of clones at least 60 days after enrolment; to account for negative  
113 samples due to fluctuations in parasite density, we allowed 3 “skips” in detection, and classified an  
114 infection as cleared only if it was not identified in 4 sequential samples from routine visits<sup>19</sup>. Entomologic  
115 surveillance was performed throughout follow-up, with mosquito sampling every two weeks with CDC  
116 light-traps in all rooms where cohort participants slept, and detection of *P. falciparum* sporozoites in  
117 these mosquitos by ELISA, as described elsewhere.<sup>15</sup>

118

### 119 **Statistical analysis**

120 Statistical analyses were performed in R, version 3.1.12;<sup>20</sup> full details on statistical analyses are  
121 presented in **supplemental methods**. Poisson regression with generalized estimating equations to  
122 account for repeated measures was used to estimate incidence of symptomatic malaria and of  
123 asymptomatic infections. Multiple generalized linear models were used to model measures of  
124 associations and present regression coefficients ( $\beta$ ). Where appropriate, subject specific random  
125 intercepts were added to account for correlations between observations from the same individuals. For  
126 models with a dichotomous outcome or proportion response, we assumed a binomial distribution. A log  
127 link was used for proportion responses and a logit link used for dichotomous outcomes. All continuous  
128 densities ( $d$ ) were log transformed as  $\log_{10}(d + 0.001)$  to allow densities that could possibly be zero  
129 to be retained in the model. When zero densities were not needed (e.g. for analyses including  
130 symptomatic malaria infections only), the transformation was  $\log_{10}(d)$ . To model the relationship  
131 between total gametocyte density and proportion of infected mosquitos, we considered only *P.*  
132 *falciparum* positive episodes and used generalized linear regression models similar to the approach  
133 described by Bradley *et al.*<sup>10</sup> The contribution of different populations to the infectious reservoir was  
134 estimated for i) symptomatic, asymptomatic microscopy-detected, and qPCR only-detected infections,<sup>9</sup>  
135 and ii) ages <5 years, 5-15 years and  $\geq 16$  years. For the latter calculations, all episodes were included;  
136 for episodes in which no mosquito feeding assays were performed, the proportion of infected mosquitos  
137 was modeled using the relationship between gametocyte density and proportion of infected mosquitos  
138 (**supplemental methods**).

### 139 **Role of the funding source**

140 Funders had no role in study design, data collection, analysis or interpretation. Authors had full access  
141 to study data and had the final responsibility to submit for publication.

142

143 **RESULTS**

144 Between October 4 and October 31, 2017, all 466 residents from 80 randomly selected households were  
145 enrolled into the study cohort; an additional 65 residents (total = 531) were enrolled when they joined  
146 participating households during the two-year follow-up period that ended on October 31, 2019. At  
147 baseline, parasites were detected by microscopy in 28 participants (5.3%) and by qPCR in an additional  
148 64 participants (12.1%). Median age at enrolment was 8.7 years (IQR 3.7-26.4 years); 177 (33.3%)  
149 participants were <5 years, 193 (36.3%) 5-15 years and 161 (30.3%) ≥16 years of age.

150 Mosquito exposure was relatively low; on average two female *Anopheles* mosquitos were  
151 collected per sleeping room per night, with peaks following seasonal rains (**Figure 1A**). Of 15,780 female  
152 *Anopheles* mosquitos collected, 9 were positive for *P. falciparum* sporozoites (0.06%). During study  
153 follow up, in which 12,728 qPCR assays were conducted, a decline in the number of asymptomatic  
154 infections detected per month was observed. Overall, 38 episodes of symptomatic malaria were  
155 diagnosed over 955 person-years, resulting in an overall incidence of 0.040 episodes per person-year  
156 (0.048, 0.050 and 0.020 in participants aged <5 years, 5-15 years, and ≥16 years, respectively). During  
157 the same period, 110 new asymptomatic infections were detected, giving an asymptomatic infection  
158 incidence of 0.12 episodes per personyear (0.07, 0.13 and 0.14 in participants aged < 5 years, 5-15 years,  
159 and >16 years, respectively). Mean parasite prevalence over the study period in participants aged <5  
160 years, 5-15 years, and ≥16 years was 1.2%, 3.3%, and 0.8% by microscopy, and 4.0%, 14.0%, and 10.8%  
161 by qPCR, respectively (**Figure 1B&C**). Geometric mean parasite density among symptomatic malaria  
162 infections was 10,825 parasites/μl (95% CI 5,419-22,763), markedly higher than parasite densities  
163 among asymptomatic infections (2.67 parasites/μl, 95% CI 2.22-3.17; **Figure 1D**). Among participants  
164 with asymptomatic infections, we observed lower parasite densities in the second year of follow-up,  
165 compared to the first, in individuals of all ages (mean difference in log densities between year 2 and  
166 year 1; <5 years: -0.51, 95% CI: -1.12 to 0.08, p=0.089; 5-15 years: - 1.03, 95% CI: -1.21 to - 0.83, p<0.001;  
167 and ≥16 years: - 0.35, 95% CI: -0.61 to - 0.09, p=0.008).

168

169

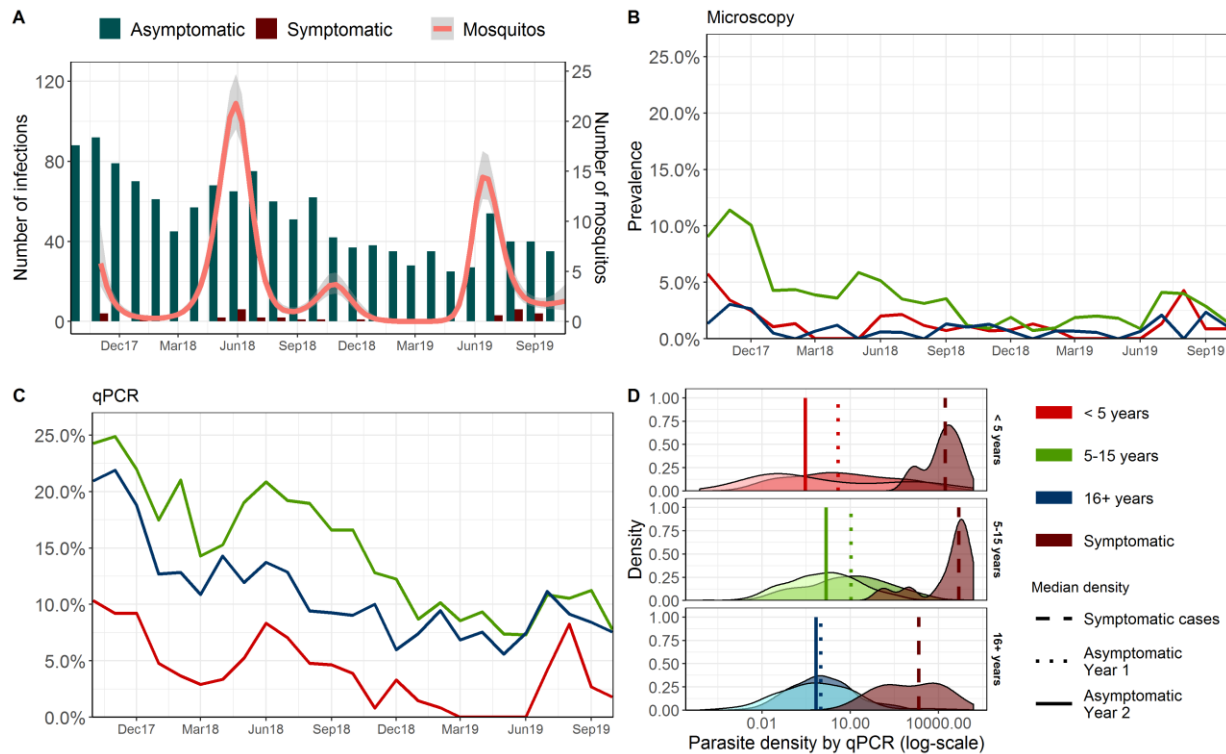

170  
171  
172  
173  
174  
175  
176  
177  
178  
179  
180  
181

**Figure 1: Symptomatic malaria episodes and asymptomatic *P. falciparum* infections.** (A) Numbers of asymptomatic qPCR-detected infections, symptomatic malaria infections, and mean number of mosquitos caught per room per night. The red line for mosquitos represents a smoothed polynomial function (grey area is the 95% confidence interval). (B) Prevalence of *P. falciparum* by microscopy for individuals at indicated ages (legend bottom right). (C) Prevalence of *P. falciparum* by qPCR. (D) Parasite density distributions by qPCR for different age groups. Asymptomatic infections follow the colour scheme for age as defined in the legend, with vertical lines indicating median densities in the different years; the less numerous symptomatic infections are presented in maroon for the two years combined.

182  
183  
184  
185  
186  
187  
188  
189  
190  
191  
192

Overall, 538 mosquito feeding assays were performed with blood samples from 107 individuals diagnosed with either symptomatic malaria (24 experiments) or asymptomatic infections (514 experiments). Of the feeds performed on asymptomatic infections, 100 were done when individuals were parasite-negative, but with a positive qPCR result on the preceding visit (**Table 1**). Parasite densities among participants selected for mosquito feeding assays were similar to those measured in the entire cohort (**Supplemental Figure S1**). At least one infected mosquito was observed in 7.2% (39/538) of feeding experiments, with a mean of 1.2% (446/37,404) mosquitos infected per experiment (range 1.1-81.4%). Of experiments that resulted in infected mosquitos, 61.5% (24/39) were from asymptomatic microscopy-positive individuals; this population was responsible for 87.9% (392/446) of the infected mosquitos, with far fewer infected mosquitos arising from asymptomatic submicroscopic infections (11.2%; 50/446) or symptomatic malaria infections (0.9%; 4/446) (**Table 1**).

193 Gametocyte prevalence by qRT-PCR was significantly higher among asymptomatic infections (63.8%;  
194 884/1308) compared to symptomatic infections (28.9%; 11/38) (OR=3.2, 95% CI: 1.1-9.3; p=0.033).  
195 46.0% (18/39) of infectious feeds and 61.2% (273/446) of infected mosquitos were from individuals with  
196 microscopically detectable gametocytes at the time of mosquito feeding. Amongst samples that were  
197 both parasite and gametocyte positive (n=895), gametocyte density was positively associated with  
198 concurrent total parasite density in asymptomatic infections ( $\beta=0.3$ ,  $p<0.001$ ), but not in symptomatic  
199 infections ( $\beta=-0.003$ ,  $p=0.903$ ) (**Figure 2A**). Gametocyte density was strongly predictive of the proportion  
200 of mosquitos that became infected when feeding on a blood meal ( $\beta=2.11$ ,  $p<0.001$ ; **Figure 2B**). Whilst  
201 there was no evidence for an interaction of age with the association between gametocyte density and  
202 proportion of mosquitos infected ( $\beta=0.088$ ,  $p=0.113$ ), gametocyte densities among gametocyte carriers  
203 differed between age groups (**Figure 2C**) (**Supplemental Figure S2**).

204

205

206

207

208

209

210

211

212

213

214

215

216

217

218



219 **Table 1. Mosquito feeding results.** A median of 69 (IQR 62-81) mosquitos were examined for infection  
 220 status per feed. The proportion of all observations reflects the occurrence (of stated infection status  
 221 and age group) among all observations (N=14,701).

222

| Age group    | Infection status                      | Proportion of all observations in the cohort, % (n) | Proportion infectious feeds, % (n/N) | Proportion mosquitos infected, % (n/N) |
|--------------|---------------------------------------|-----------------------------------------------------|--------------------------------------|----------------------------------------|
| All          | No parasites detected by qPCR         | 77.5 (11,380)                                       | 0.0 (0/100)                          | 0.0 (0/7,152)                          |
| <5 years     | Sub-microscopic parasitaemia          | 0.6 (94)                                            | 0.0 (0/11)                           | 0.0 (0/618)                            |
| <5 years     | Microscopically detected parasitaemia | 0.3 (37)                                            | 75.0 (6/8)                           | 17.7 (86/486)                          |
| <5 years     | Symptomatic malaria                   | 0.1 (12)                                            | 0.0 (0/7)                            | 0.0 (0/484)                            |
| 5 – 15 years | Sub-microscopic parasitaemia          | 3.9 (569)                                           | 6.7 (14/206)                         | 0.4 (53/14,358)                        |
| 5 – 15 years | Microscopically detected parasitaemia | 1.2 (172)                                           | 20.4 (17/83)                         | 5.2 (293/5,658)                        |
| 5 – 15 years | Symptomatic malaria                   | 0.1 (20)                                            | 8.3 (1/12)                           | 0.5 (4/758)                            |
| >16 years    | Sub-microscopic parasitaemia          | 2.8 (405)                                           | 0.0 (0/96)                           | 0.0 (0/6,879)                          |
| >16 years    | Microscopically detected parasitaemia | 0.2 (32)                                            | 10.0 (1/10)                          | 1.5 (10/667)                           |
| >16 years    | Symptomatic malaria                   | 0.04 (6)                                            | 0.0 (0/5)                            | 0.0 (0/344)                            |

223

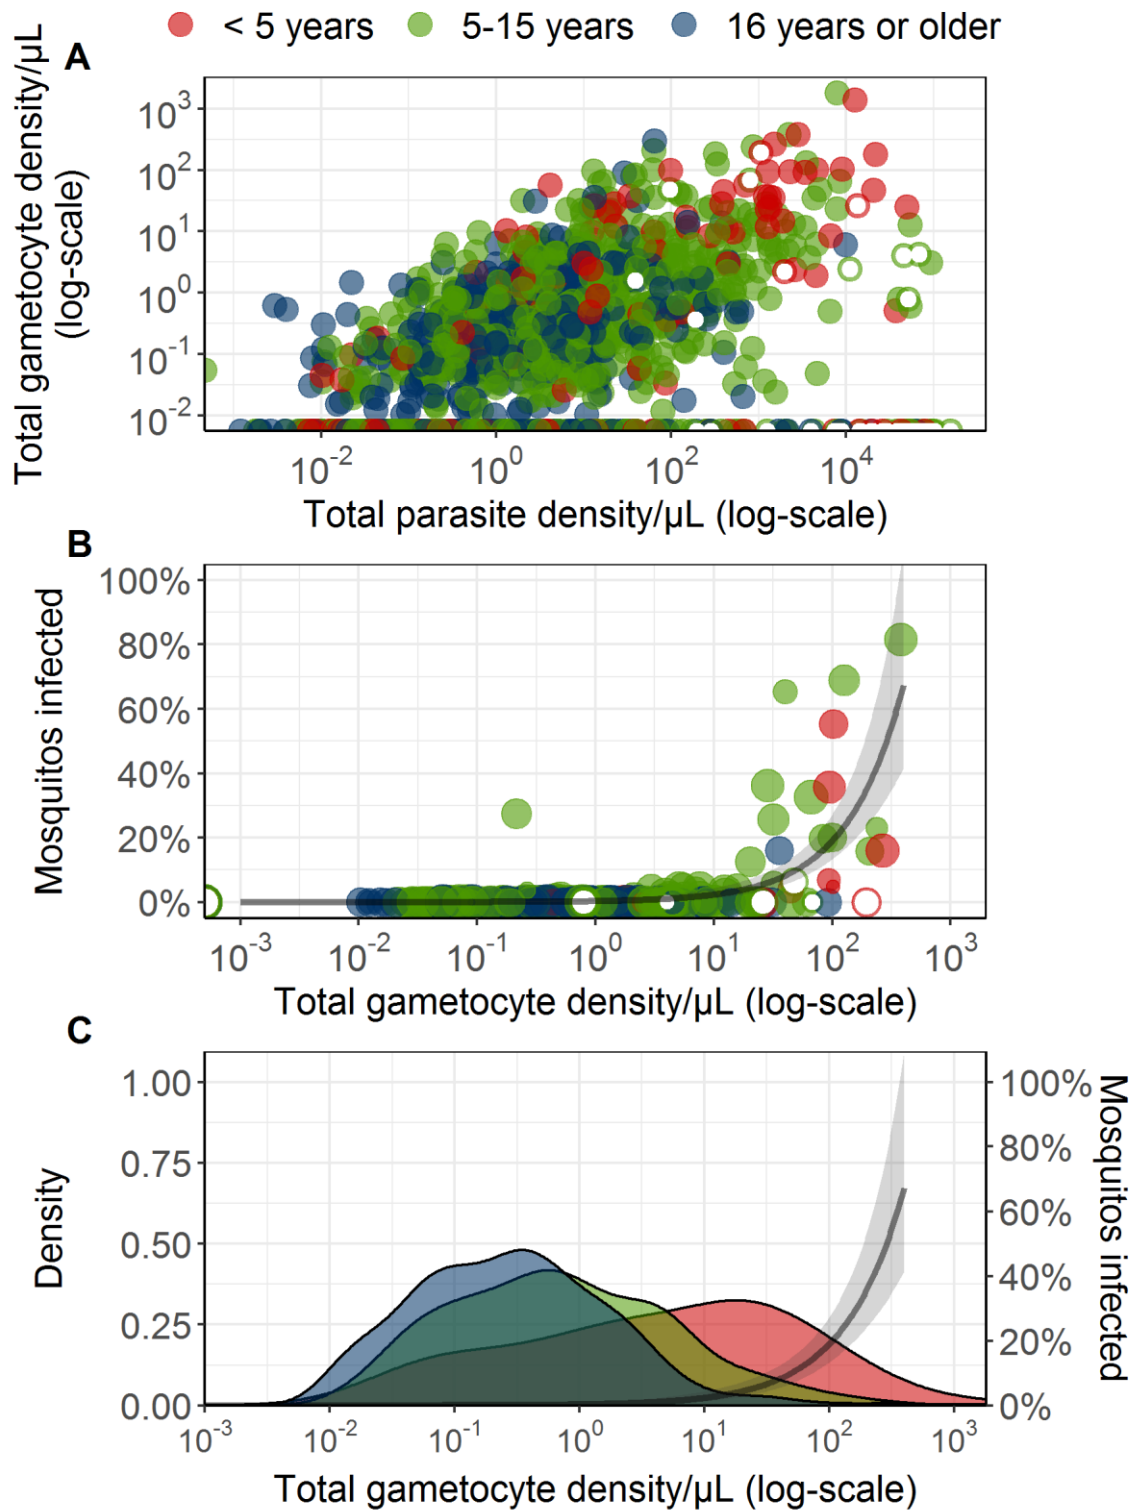

224

225 **Figure 2: Gametocyte prevalence and density in relation to infectiousness to mosquitos.** (A). Relationship between total  
226 parasite density and total gametocyte density. Each symbol is a parasite-positive episode; filled circles represent asymptomatic  
227 individuals and open circles symptomatic malaria infections. (B) Percentage of infected mosquitos in relation to gametocyte  
228 density. The size of the symbols reflects the number of mosquitos dissected; the colours are as in A. The line represents the  
229 best fitted association and the shaded area the 95% CI. (C) Gametocyte density by qRT-PCR among individuals who were  
230 gametocyte positive in different age groups (colours as above). Median gametocyte density among gametocyte carriers overall

231 was 4.89 (IQR: 0.49 – 28.35) for children <5 years, 0.66 (IQR: 0.15 – 3.12) for children 5-15 years ( $p < 0.001$ ) and 0.28 (IQR: 0.07  
232 – 0.89) for older individuals ( $p < 0.001$ ). The black line with grey shading is as in panel B.

233  
234 Considering both transmissibility of infections and their relative frequency in our study cohort,  
235 asymptomatic microscopy-detected infections were estimated to be responsible for 83.8% of the  
236 infectious reservoir, with asymptomatic qPCR-detected infections and symptomatic infections being  
237 responsible for 15.6% and 0.6%, respectively (**Figure 3A**). We estimated the contribution of different age  
238 groups to the infectious reservoir based on mosquito feeding results and, when no feeding was done,  
239 parasite and gametocyte density measures to model infectiousness to mosquitos. We estimated that  
240 children aged 5-15 years were responsible for 56.8% of the infectious reservoir, followed by children  
241 aged < 5 years (27.5%) and participants age 16 years and older (15.7%) (**Figure 3B**).

242

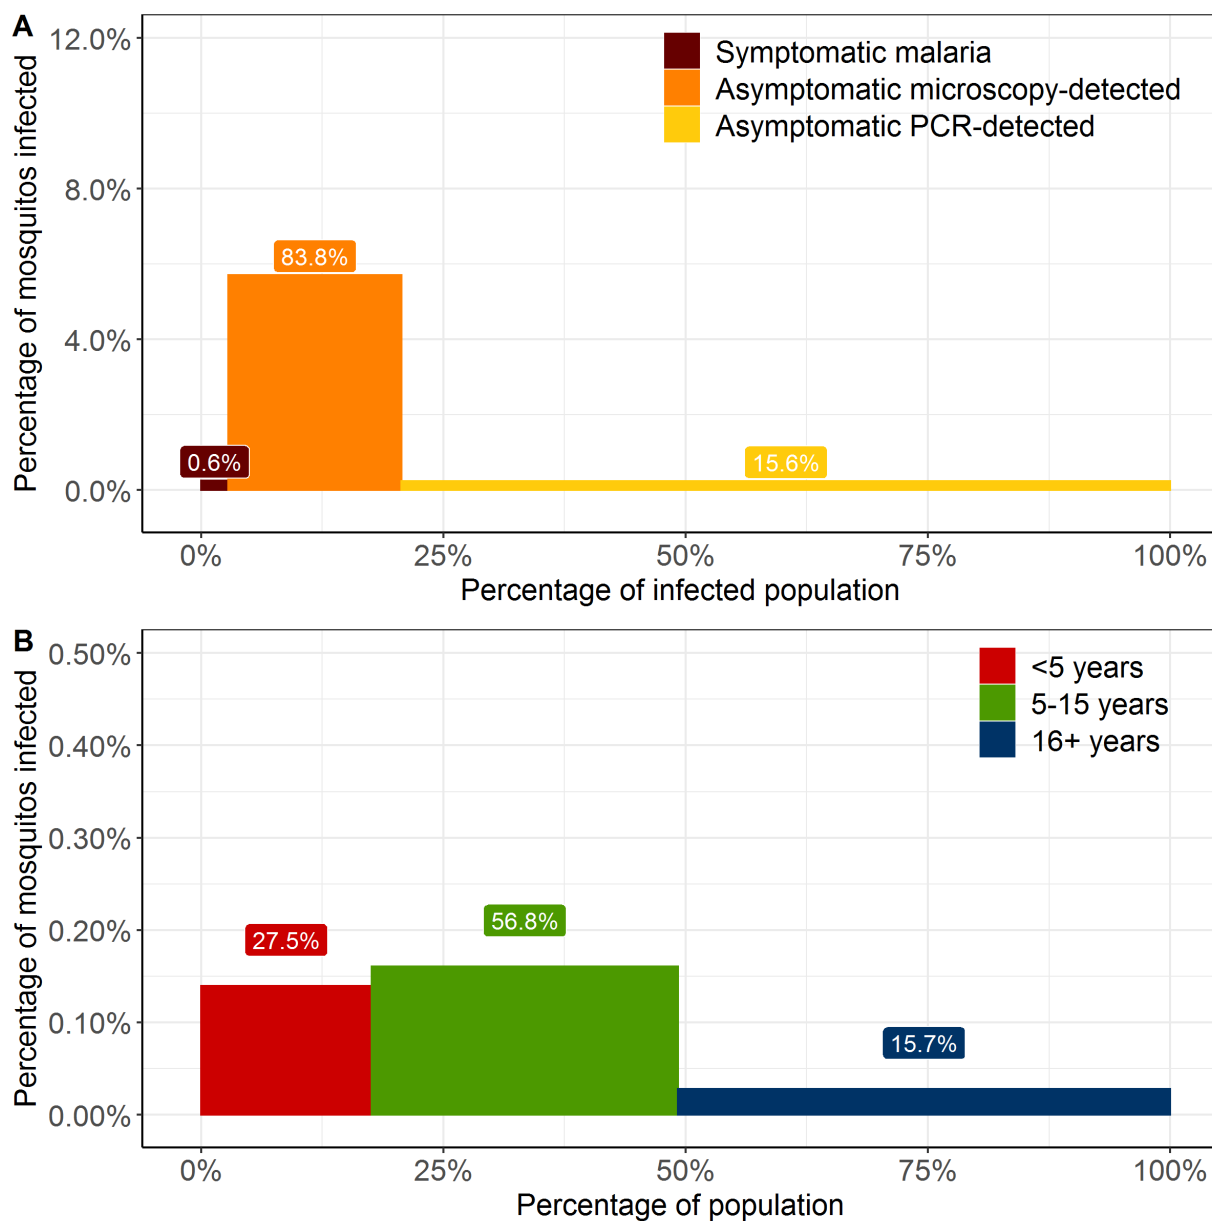

243  
 244 **Figure 3: Contribution of different populations to the human infectious reservoir for malaria.** (A) The contribution of different  
 245 infection types to the infectious reservoir. Bar widths indicate the proportion of the infected population in each category; bar  
 246 heights indicate the proportion of mosquitoes that became infected when feeding on this population. Values above the bars are  
 247 estimates of the proportional contribution of each of the three populations to the infectious reservoir. (B) The contribution of  
 248 different age groups to the human infectious reservoir, displayed as described for panel A.

249  
 250 Overall, 75 individuals participated in multiple mosquito-feeding assays (range 2-19 assays), which  
 251 allowed us to examine variations in transmission potential between individuals and over time during  
 252 chronic infections. Whilst 35.9% (14/39) of infectious feeds were performed on samples from individuals  
 253 with parasites below the level detected by microscopy, all infectious individuals were microscopy-  
 254 positive for asexual parasites or gametocytes at least once during follow-up (**Figure 4A**). Remarkably,

255 four children (0·8% of the cohort) were responsible for 62·6% (279/446) of all infected mosquitos. These  
256 highly infectious individuals were <5 years (n=2) or 5-15 years (n=2), some with clonally complex  
257 infections (up to 23 clones detected during follow-up); three of these children acquired infections during  
258 follow-up that were transmissible in the absence of symptoms. Twenty-eight parasitaemic individuals  
259 never infected mosquitos despite  $\geq 5$  mosquito feeds; 78·5% (22/28) of these individuals had infections  
260 documented by qPCR for more than 12 months (**Figure 4B**).

261 *P. falciparum* DNA was detectable by nested-PCR in 92·8% (414/446) of infected mosquito  
262 midguts; amplicon deep sequencing was successful for 72·2% (322/446) of these samples, providing  
263 genotyping data from at least one mosquito for 33 of 39 (84·6%) successful feeds. Identification of  
264 genotypes over time, in relation to transmission to mosquitos, is presented for the four most infectious  
265 individuals in the cohort (**Figure 5**; graphs for other participants are provided in **Supplemental Figure**  
266 **S3**). Two genetically complex infections repeatedly transmitted multiple clones to mosquitos (**Figure 5A**  
267 **& 5C**); two single-clone infections resulted in short periods of high infectivity to mosquitos (**Figure 5B &**  
268 **5D**). Overall, 90·5% of parasite clones that were transmitted to mosquitos were detected in the blood  
269 of the participant on the day of mosquito feeding; 6·6% were only detected in the blood on prior visits,  
270 and 2·9% were never detected in the blood of that participant. Furthermore, there was a strong positive  
271 association between the abundance of a clone in peripheral blood and the abundance recovered in  
272 infected mosquitos ( $\beta = 0.43$ ,  $p < 0.001$ ) (**Supplemental Figure S4**).

273

274

275

276

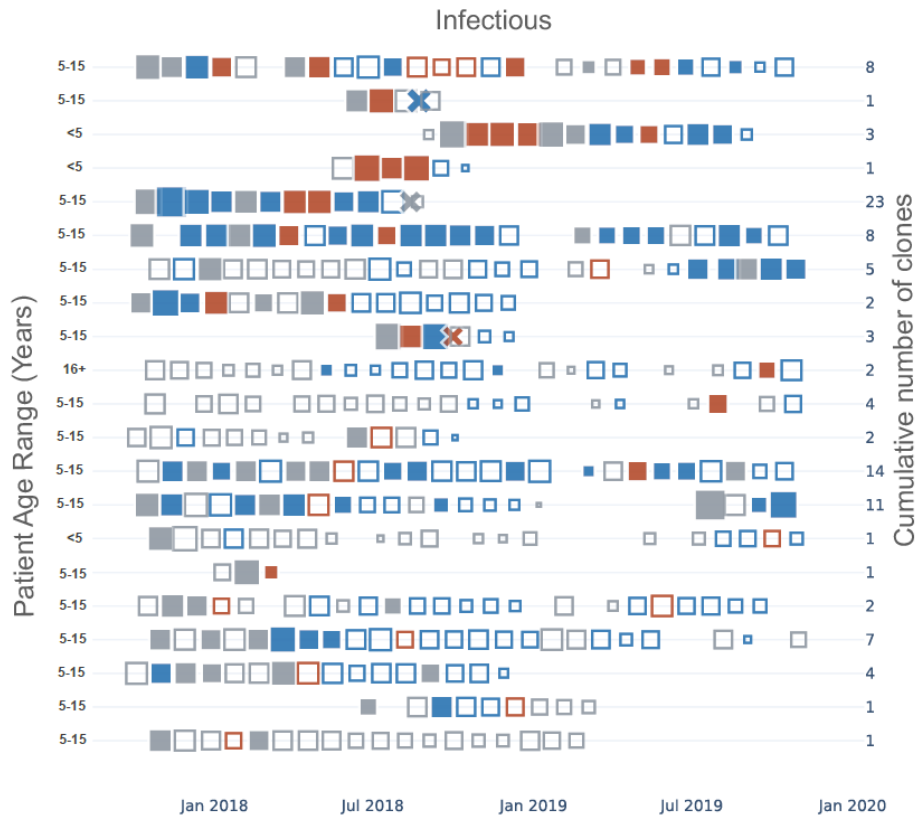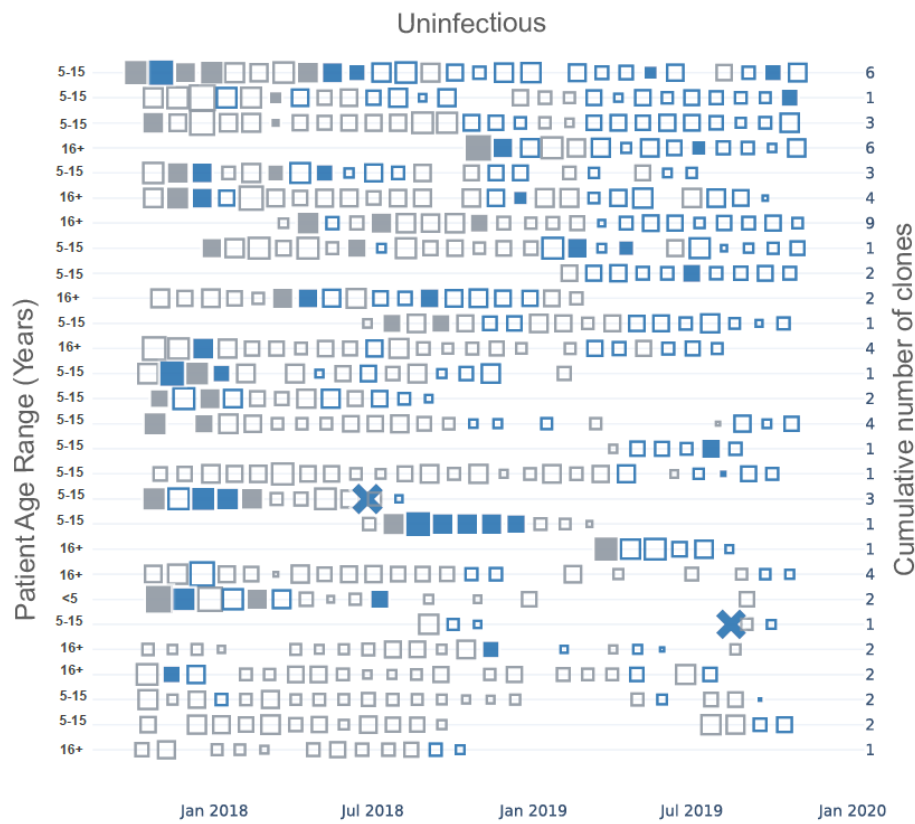

- |                                                                      |                                                                         |                                                                     |
|----------------------------------------------------------------------|-------------------------------------------------------------------------|---------------------------------------------------------------------|
| <span style="color: red;">X</span> clinical malaria, infectious feed | <span style="color: blue;">X</span> clinical malaria, uninfectious feed | <span style="color: grey;">X</span> clinical malaria, feed not done |
| <span style="color: red;">■</span> microscopy +, infectious feed     | <span style="color: blue;">■</span> microscopy +, uninfectious feed     | <span style="color: grey;">■</span> microscopy +, feed not done     |
| <span style="border: 1px solid red;">□</span> qPCR+, infectious feed | <span style="border: 1px solid blue;">□</span> qPCR+, uninfectious feed | <span style="border: 1px solid grey;">□</span> qPCR+, feed not done |

278 **Figure 4. Longitudinal infectivity to mosquitos.** Each row represents a cohort participant over the course of 24 months. Each  
 279 square indicates a visit when parasites were detected, with the size of the square reflecting parasite density. The top panel (A)  
 280 contains all individuals who were infectious on at least one occasion, ranked from top to bottom based on the total number of  
 281 mosquitos they infected. The bottom panel (B) contains a selection of individuals (chosen from 86 individuals) who were never  
 282 infectious but had repeated feeding assays.  
 283

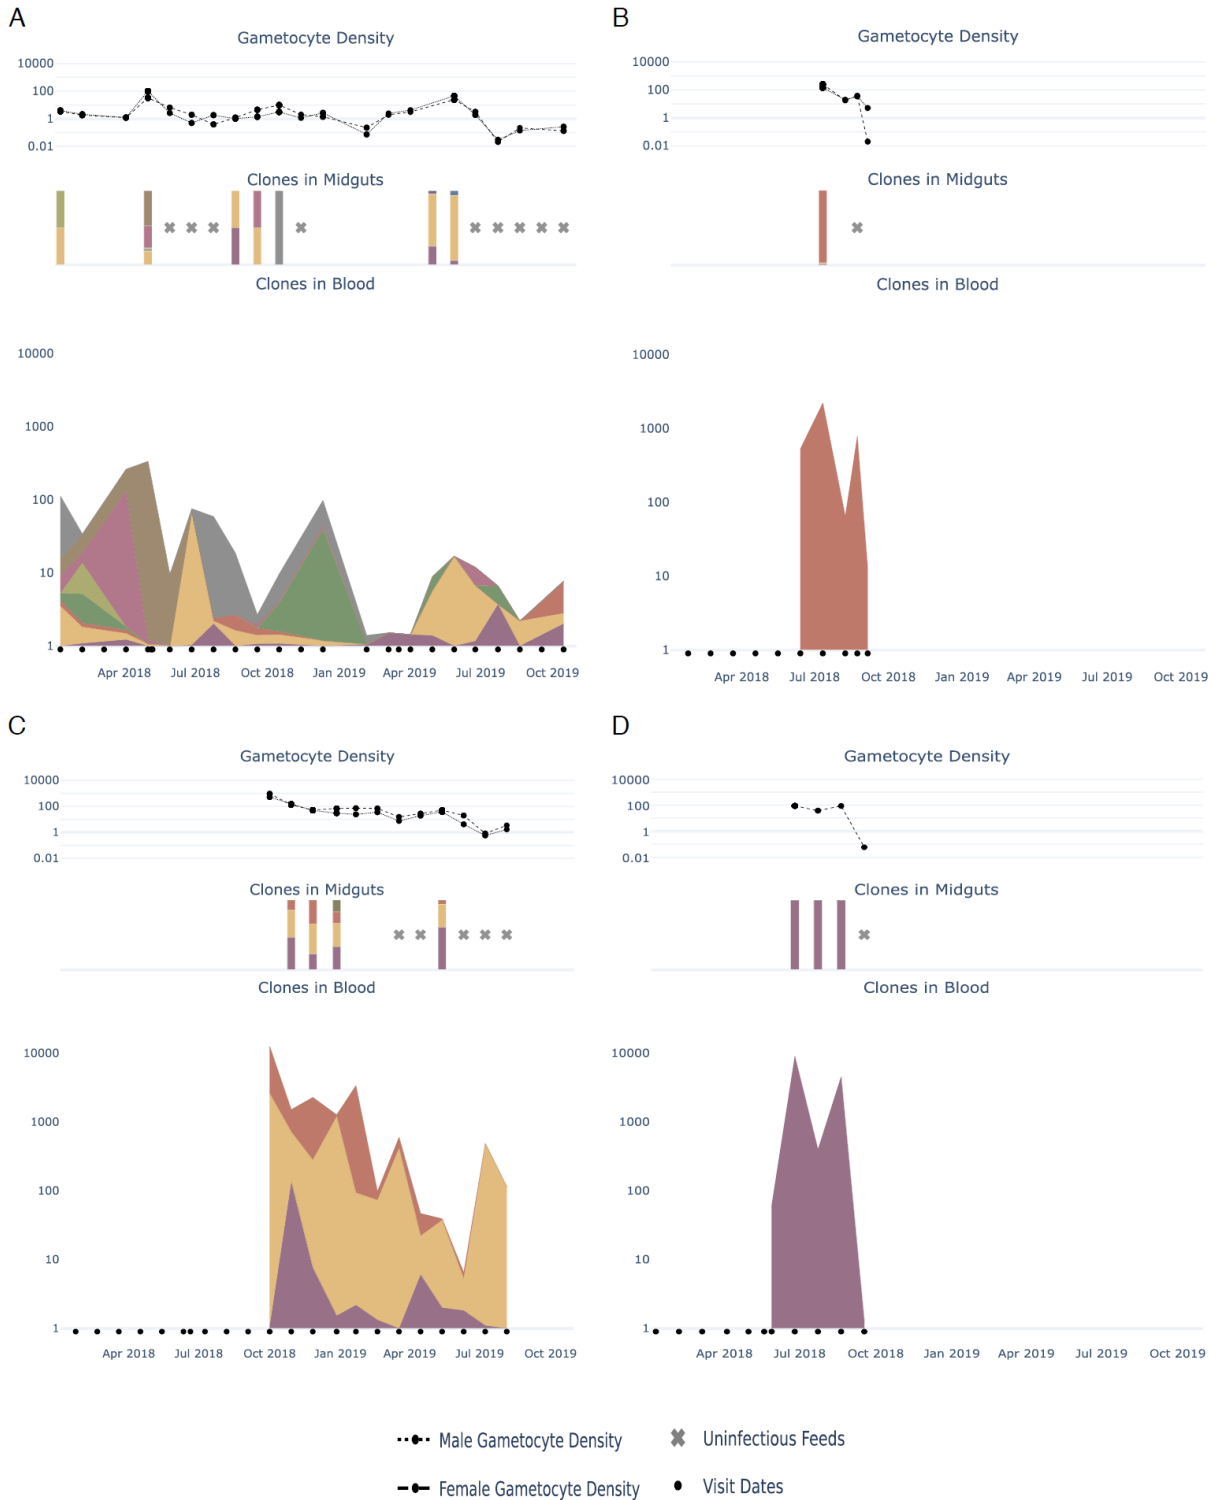

284

285

286 **Figure 5. Gametocyte density and parasite clones recovered from blood and mosquito midguts in the 4 most infectious**  
287 **individuals.** Male and female gametocyte densities and the number of clones detected in blood and infected mosquitos are  
288 shown for samples from the 4 individuals (A-D). Bars indicate infectious feeds. Total parasite density and clonal composition  
289 of blood samples are presented in the bottom panels. Each colour indicates the contribution of a unique *P. falciparum* clone  
290

## 291 **DISCUSSION**

292 To effectively eliminate malaria, the human infectious reservoir must be targeted. However, very few  
293 studies have quantified this reservoir, and those that did were largely cross-sectional in nature, ignoring  
294 the durations of asymptomatic infections and fluctuations in parasite densities over time.<sup>2,6,21</sup> In this  
295 study, we determined *P. falciparum* infection status, gametocyte carriage and transmissibility over two  
296 years in an area of Uganda that previously had high malaria transmission, but is now under highly  
297 effective malaria control. Our longitudinal sampling allowed novel insights into natural transmission  
298 dynamics and their relevance for control. Asymptomatic microscopy-detectable infections, which were  
299 particularly prevalent in school-aged children, were the main source of mosquito infections. These  
300 asymptomatic infections commonly persisted for several months, during which they continued to  
301 produce infectious gametocytes. These findings highlight opportunities for demographically targeted  
302 malaria control interventions.

303 Asymptomatic parasite carriers comprised >99% of the human infectious reservoir for malaria  
304 in our setting. Within this asymptomatic population, parasite density was positively associated with  
305 gametocyte density,<sup>22</sup> and those individuals with microscopically detectable infections were responsible  
306 for 83.8% of the infectious reservoir. Symptomatic malaria infections were uncommon (0.040 episodes  
307 per person year) and comprised only 0.6% of the human infectious reservoir. This very small contribution  
308 of symptomatic malaria infections to transmission is consistent with recent estimates for *P. falciparum*  
309 transmission in Ethiopia,<sup>9</sup> but markedly different from findings in Cambodia and Thailand, where  
310 symptomatic malaria cases with high gametocyte densities were suggested to be more important than  
311 asymptomatic malaria infections for sustaining malaria transmission.<sup>7,8</sup> These contrasting findings may,  
312 in part, be attributable to treatment-seeking behaviour. In our cohort, symptomatic malaria episodes  
313 were less likely, compared to asymptomatic infections, to be gametocytaemic upon presentation. This  
314 result suggests that most symptomatic malaria cases presented early, before the 9-12 day maturation  
315 of gametocytes was completed.<sup>23,24</sup> In asymptomatic infections, parasite density, which is strongly  
316 associated with immunity of the infected individual,<sup>5,25,26</sup> is likely to be crucial in determining  
317 transmissibility. Parasite densities that were above the threshold of detection by microscopy were  
318 relatively common in cohort children, who frequently had concurrent gametocyte densities high enough  
319 to result in mosquito infection. Parasite densities generally decline with reduction in transmission



320 intensity,<sup>2,26</sup> and in some settings the majority of asymptomatic infections persist with ultra-low  
321 densities that are probably incompatible with transmission to mosquitos.<sup>12</sup>

322 The occurrence and kinetics of asymptomatic infections are related to immune responses that  
323 control parasite density and symptoms, and to genetic diversity of parasite populations.<sup>2</sup> Whilst our  
324 study setting was historically characterized by intense transmission<sup>15,27</sup>, many of our cohort participants  
325 were born after IRS was implemented in the area and malaria exposure dropped to very low levels.<sup>15</sup>  
326 Some of these young, presumably malaria-naive children acquired incident infections without  
327 experiencing symptoms, supporting earlier indications that children exposed to low transmission can  
328 acquire immunity very efficiently.<sup>25</sup> However, several of these incident asymptomatic infections were  
329 highly important for transmission to mosquitos.

330 We observed marked differences in parasite carriage, parasite density and transmission  
331 potential between age groups. Parasite prevalence by microscopy and qPCR and parasite densities were  
332 highest among children aged 5-15 years.<sup>4,5,28</sup> Older individuals had considerably lower parasite and  
333 gametocyte densities<sup>4</sup> (**Supplemental Figure 2**). When combining the age distribution in the study  
334 district with parasitological and transmission data, individuals aged < 5, 5-15 and  $\geq$  16 years were  
335 estimated to comprise 27.5%, 56.8% and 15.7% of the human infectious reservoir, respectively. In all  
336 age groups, parasite densities showed a modest decline over time, with considerable fluctuations in  
337 densities during individual infections. In Vietnam, 7% of ultralow density *P. falciparum* and *P. vivax*  
338 infections escalated into microscopy positive infections.<sup>6</sup> Longitudinal studies from Senegal and Ghana  
339 also showed marked fluctuations in the detectability of *P. falciparum* infections over time.<sup>2</sup> We observed  
340 similar oscillations in parasite densities. A unique component of our study was longitudinal assessments  
341 of transmissibility to mosquitos of these oscillating infections (with up to 19 infectivity assessments per  
342 participant). We observed marked heterogeneity in transmission potential between and within  
343 individual infections, with four children (0.8% of our cohort) responsible for more than 60% of all  
344 infected mosquitos. These four children and all individuals who were infectious to mosquitos were  
345 microscopy-positive at least once during follow-up, suggesting that 'test and treat' approaches could be  
346 used for control. However, 15.6% of the human infectious reservoir was attributable to infections that  
347 were submicroscopic at the time of feeding. This suggests that, unless repeated frequently, 'test and  
348 treat' approaches will miss part of the human infectious reservoir.

349 Our study had several limitations. First, we used membrane feeding experiments that  
350 underestimate transmission potential compared to direct skin feeding.<sup>29</sup> The lower sensitivity of  
351 membrane feeding was likely compensated by the large number of mosquitos we examined per feeding  
352 assay (median 69) that was much higher than natural mosquito exposure (average of 2 per indoor  
353 trapping night).<sup>21</sup> Second, for logistical reasons we based our selection of participants for mosquito  
354 feeding on parasite carriage 4 weeks prior to feeds, and thus we did not measure infectiousness in the

355 first weeks of incident asymptomatic infections. Third, health seeking behaviour among our cohort  
356 participants, who had exceptionally good access to care, may not have reflected care in other settings.  
357 Some of the symptomatic malaria infections that we detected early after infection would likely not have  
358 received such prompt treatment in other settings, and thus might have developed into chronic infections  
359 with transmissible gametocyte densities.

360 Our findings have several important implications for malaria control. We identified chronic  
361 asymptomatic infections with microscopically detectable parasitaemia as the most important drivers of  
362 transmission in our setting. These infections frequently occurred in school-aged children, supporting  
363 hypotheses that schoolchildren form an important and accessible reservoir that could be targeted by  
364 malaria control interventions, such as chemoprevention.<sup>30</sup> Our finding that a small minority of  
365 individuals are disproportionately important for transmission poses challenges for community-wide  
366 interventions. Highly infectious individuals frequently carried parasites for several months at variable  
367 densities and without accompanying symptoms. Relying on passive detection of symptomatic infections  
368 or community mass screening with conventional diagnostics may thus have insufficient impact on the  
369 infectious reservoir for transmission in settings of declining transmission such as the one we studied  
370 here. Identifying these populations that likely sustain malaria transmission is key to progressing toward  
371 malaria elimination and to avoiding resurgence if regional malaria control deteriorates.

372

### 373 **Contributors**

374 TB, CD, GD, SS, PJR, BG and MK conceived and designed the study. CA, JCR, JB, JO, AM, MC, PO, KL  
375 collected the data JR, CA, NT, JB, JCR and TB analysed the data. GD, IRB, JCR and LMK advised on the  
376 analysis. CA, TB, JB, PJR, CD, GD and SS drafted the first version of the manuscript. All authors saw draft  
377 of the manuscript, contributed to data interpretation and provided input on writing. All authors critically  
378 reviewed the manuscript.

379

### 380 **Declaration of interests**

381 We declare no competing interests

382

### 383 **Acknowledgments**

384 We thank the study team and the Infectious Diseases Research Collaboration for administrative and  
385 technical support. We are grateful to the study participants who participated in this study and their  
386 families.

387

### 388 **Financial support**

389 Funding was provided by the National Institutes of Health as part of the International Centers of  
390 Excellence in Malaria Research (EICEMR) program (AI089674) and another program (AI075045), the Bill  
391 & Melinda Gates Foundation (INDIE OPP1173572) and a fellowship from the European Research Council  
392 to TB (ERC-2014-StG 639776). MDC is supported by the Fogarty International Center (P0529898 and  
393 TW009343) and the Centennial Travel Award from the American Society of Tropical Medicine and  
394 Hygiene. JIN is supported by Fogarty International Center (TW010365). BG is a Chan Zuckerberg Biohub  
395 investigator. The ClinEpiDB platform is supported by the Bill & Melinda Gates Foundation (OPP1169785).  
396  
397

## 398 REFERENCES

- 399 1. WHO. World malaria report 2019. 2019.
- 400 2. Slater HC, Ross A, Felger I, et al. The temporal dynamics and infectiousness of subpatent  
401 *Plasmodium falciparum* infections in relation to parasite density. *Nat Commun* 2019; **10**(1): 1433.
- 402 3. Bousema T, Okell L, Felger I, Drakeley C. Asymptomatic malaria infections: detectability,  
403 transmissibility and public health relevance. *Nat Rev Microbiol* 2014; **12**(12): 833-40.
- 404 4. Felger I, Maire M, Bretscher MT, et al. The dynamics of natural *Plasmodium falciparum*  
405 infections. *PLoS One* 2012; **7**(9): e45542.
- 406 5. Buchwald AG, Sorkin JD, Sixpence A, et al. Association Between Age and *Plasmodium falciparum*  
407 Infection Dynamics. *Am J Epidemiol* 2019; **188**(1): 169-76.
- 408 6. Nguyen TN, von Seidlein L, Nguyen TV, et al. The persistence and oscillations of submicroscopic  
409 *Plasmodium falciparum* and *Plasmodium vivax* infections over time in Vietnam: an open cohort study.  
410 *Lancet Infect Dis* 2018; **18**(5): 565-72.
- 411 7. Lin JT, Saunders DL, Meshnick SR. The role of submicroscopic parasitemia in malaria  
412 transmission: what is the evidence? *Trends Parasitol* 2014; **30**(4): 183-90.
- 413 8. Vantaux A, Samreth R, Piv E, et al. Contribution to Malaria Transmission of Symptomatic and  
414 Asymptomatic Parasite Carriers in Cambodia. *J Infect Dis* 2018; **217**(10): 1561-8.
- 415 9. Tadesse FG, Slater HC, Chali W, et al. The relative contribution of symptomatic and  
416 asymptomatic *Plasmodium vivax* and *Plasmodium falciparum* infections to the infectious reservoir in a  
417 low-endemic setting in Ethiopia. *Clin Infect Dis* 2018.
- 418 10. Bradley J, Stone W, Da D, et al. Predicting the likelihood and intensity of mosquito infection from  
419 sex specific *Plasmodium falciparum* gametocyte density *eLife* 2018; **7**: pii: e34463.
- 420 11. Goncalves BP, Kapulu MC, Sawa P, et al. Examining the human infectious reservoir for  
421 *Plasmodium falciparum* malaria in areas of differing transmission intensity. *Nat Commun* 2017; **8**(1):  
422 1133.
- 423 12. Hofmann NE, Gruenberg M, Nate E, et al. Assessment of ultra-sensitive malaria diagnosis versus  
424 standard molecular diagnostics for malaria elimination: an in-depth molecular community cross-  
425 sectional study. *Lancet Infect Dis* 2018; **18**(10): 1108-16.
- 426 13. group Wgs. Gametocyte carriage in uncomplicated *Plasmodium falciparum* malaria following  
427 treatment with artemisinin combination therapy: a systematic review and meta-analysis of individual  
428 patient data. *BMC Med* 2016; **14**: 79.
- 429 14. Stepniewska K, Price RN, Sutherland CJ, et al. *Plasmodium falciparum* gametocyte dynamics in  
430 areas of different malaria endemicity. *Malar J* 2008; **7**: 249.
- 431 15. Nankabirwa JI, Arinaitwe E, Rek J, et al. Malaria Transmission, Infection, and Disease following  
432 Sustained Indoor Residual Spraying of Insecticide in Tororo, Uganda. *Am J Trop Med Hyg* 2020.
- 433 16. Hofmann N, Mwingira F, Shekalaghe S, Robinson LJ, Mueller I, Felger I. Ultra-sensitive detection  
434 of *Plasmodium falciparum* by amplification of multi-copy subtelomeric targets. *PLoS Med* 2015; **12**(3):  
435 e1001788.
- 436 17. Meerstein-Kessel L, Andolina C, Carrio E, et al. A multiplex assay for the sensitive detection and  
437 quantification of male and female *Plasmodium falciparum* gametocytes. *Malar J* 2018; **17**(1): 441.
- 438 18. Musiime AK, Okoth J, Conrad M, et al. Is that a real oocyst? Insectary establishment and  
439 identification of *Plasmodium falciparum* oocysts in midguts of *Anopheles* mosquitoes fed on infected  
440 human blood in Tororo, Uganda. *Malar J* 2019; **18**(1): 287.
- 441 19. Briggs JJ, Teyssier N, Nankabirwa JI, et al. Sex-based differences in clearance of chronic  
442 *Plasmodium falciparum* infection. *medRxiv* 2020; <https://doi.org/10.1101/2020.06.10.20127720>
- 443 20. The R Project for Statistical Computing. <https://www.r-project.org/>.
- 444 21. Stone W, Goncalves BP, Bousema T, Drakeley C. Assessing the infectious reservoir of falciparum  
445 malaria: past and future. *Trends Parasitol* 2015; **31**(7): 287-96.
- 446 22. Koepfli C, Robinson LJ, Rarau P, et al. Blood-Stage Parasitaemia and Age Determine *Plasmodium*  
447 *falciparum* and *P. vivax* Gametocytaemia in Papua New Guinea. *PLoS One* 2015; **10**(5): e0126747.

- 448 23. Price R, Nosten F, Simpson JA, et al. Risk factors for gametocyte carriage in uncomplicated  
449 falciparum malaria. *Am J Trop Med Hyg* 1999; **60**(6): 1019-23.
- 450 24. Shute PG, Maryon M. A study of gametocytes in a West African strain of *Plasmodium falciparum*.  
451 *Transactions of the Royal Society of Tropical Medicine and Hygiene* 1951; **44**(4): 421-38.
- 452 25. Rodriguez-Barraquer I, Arinaitwe E, Jagannathan P, et al. Quantification of anti-parasite and anti-  
453 disease immunity to malaria as a function of age and exposure. *Elife* 2018; **7**.
- 454 26. Okell LC, Bousema T, Griffin JT, Ouedraogo AL, Ghani AC, Drakeley CJ. Factors determining the  
455 occurrence of submicroscopic malaria infections and their relevance for control. *Nat Commun* 2012; **3**:  
456 1237.
- 457 27. Katureebe A, Zinszer K, Arinaitwe E, et al. Measures of Malaria Burden after Long-Lasting  
458 Insecticidal Net Distribution and Indoor Residual Spraying at Three Sites in Uganda: A Prospective  
459 Observational Study. *PLoS Med* 2016; **13**(11): e1002167.
- 460 28. Goncalves BP, Drakeley C, Bousema T. Infectivity of Microscopic and Submicroscopic Malaria  
461 Parasite Infections in Areas of Low Malaria Endemicity. *J Infect Dis* 2016; **213**(9): 1516-7.
- 462 29. Meibalan E, Barry A, Gibbins MP, et al. *P. falciparum* gametocyte density and infectivity in  
463 peripheral blood and skin tissue of naturally infected parasite carriers in Burkina Faso. *J Infect Dis* 2019.
- 464 30. Staedke SG, Maiteki-Sebuguzi C, Rehman AM, et al. Assessment of community-level effects of  
465 intermittent preventive treatment for malaria in schoolchildren in Jinja, Uganda (START-IPT trial): a  
466 cluster-randomised trial. *Lancet Glob Health* 2018; **6**(6): e668-e79.

467

468
